# Supplementary material
Source: Springer Nature journal article supplement (https://www.springermedizin.de/resource/supplementary/12879_2012_2395_MOESM2_ESM.pdf/9444488)

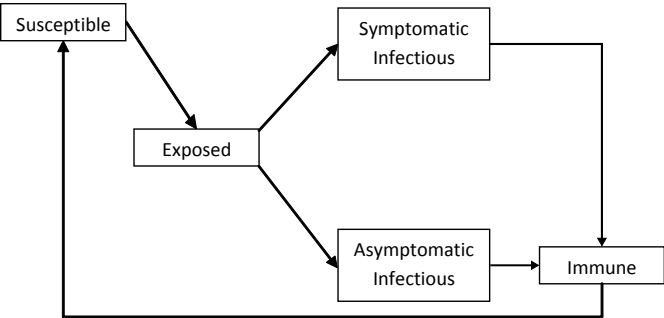

Supplement: MOESM2 [file 9444488]
